# Supplementary material for: Discovery of Novel Diterpenoids from Sinularia arborea
Source: MDPI journal article supplement (doi:10.3390/md12010385), 2014-01-17

## Supplementary Information

**Figure S1.**  $^1\text{H}$  NMR spectrum (400 MHz) of compound **1** in  $\text{CDCl}_3$ .

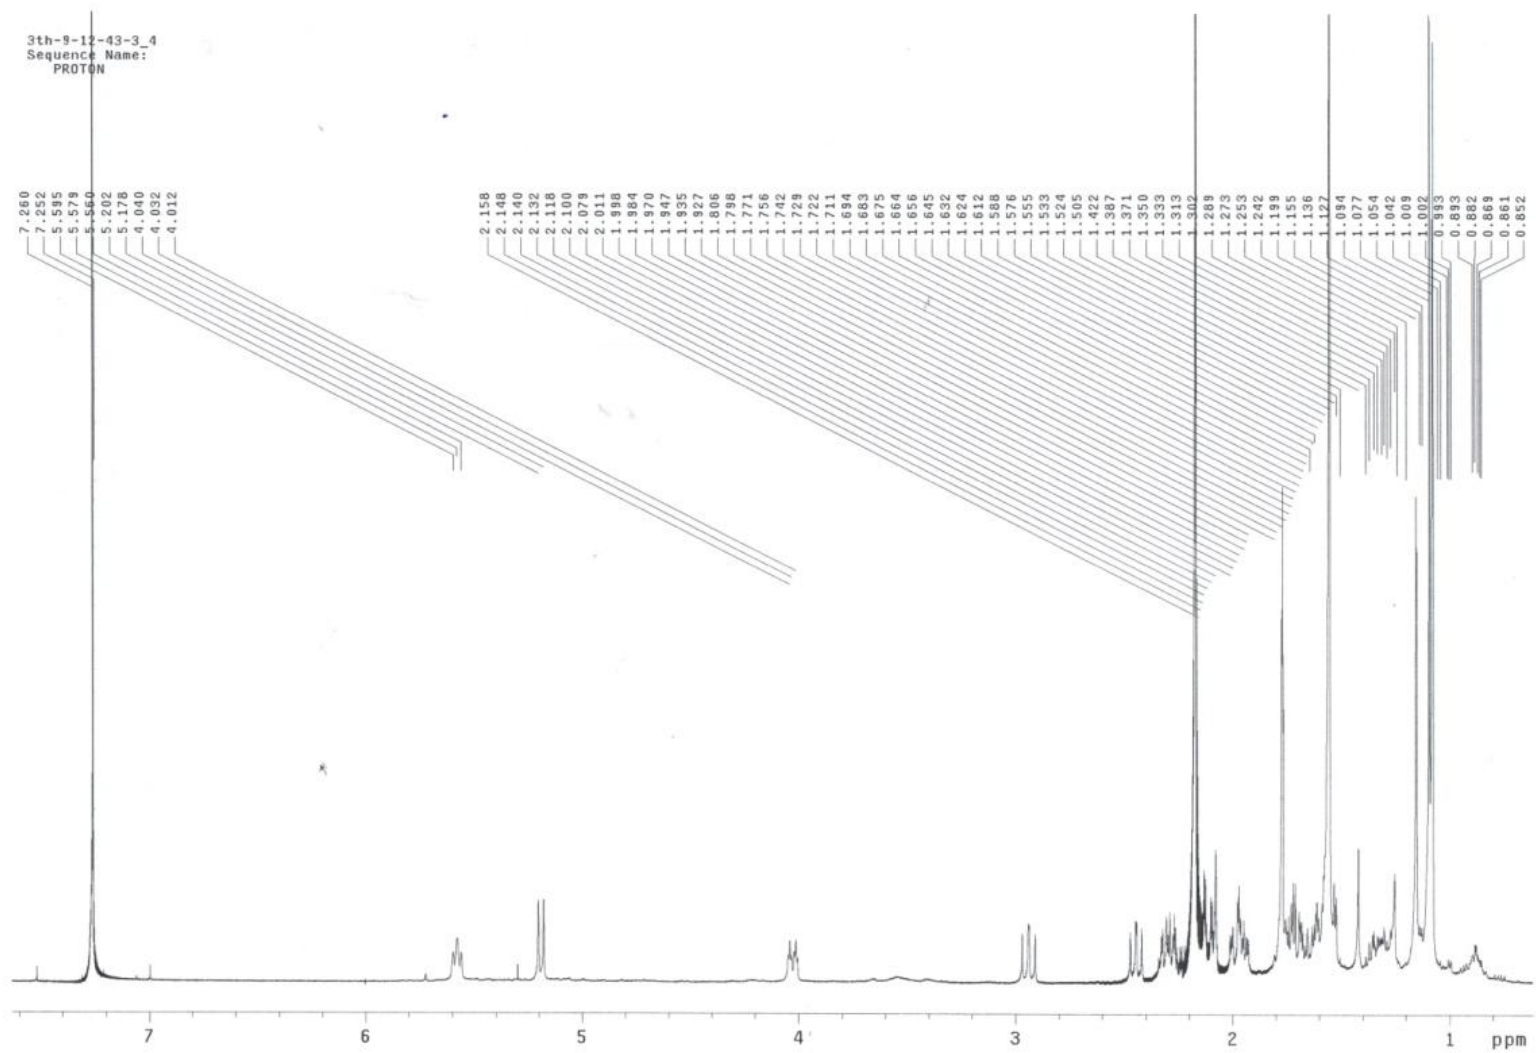

**Figure S2.**  $^1\text{H}$  NMR spectrum (400 MHz) of compound **1** in  $\text{CDCl}_3$ .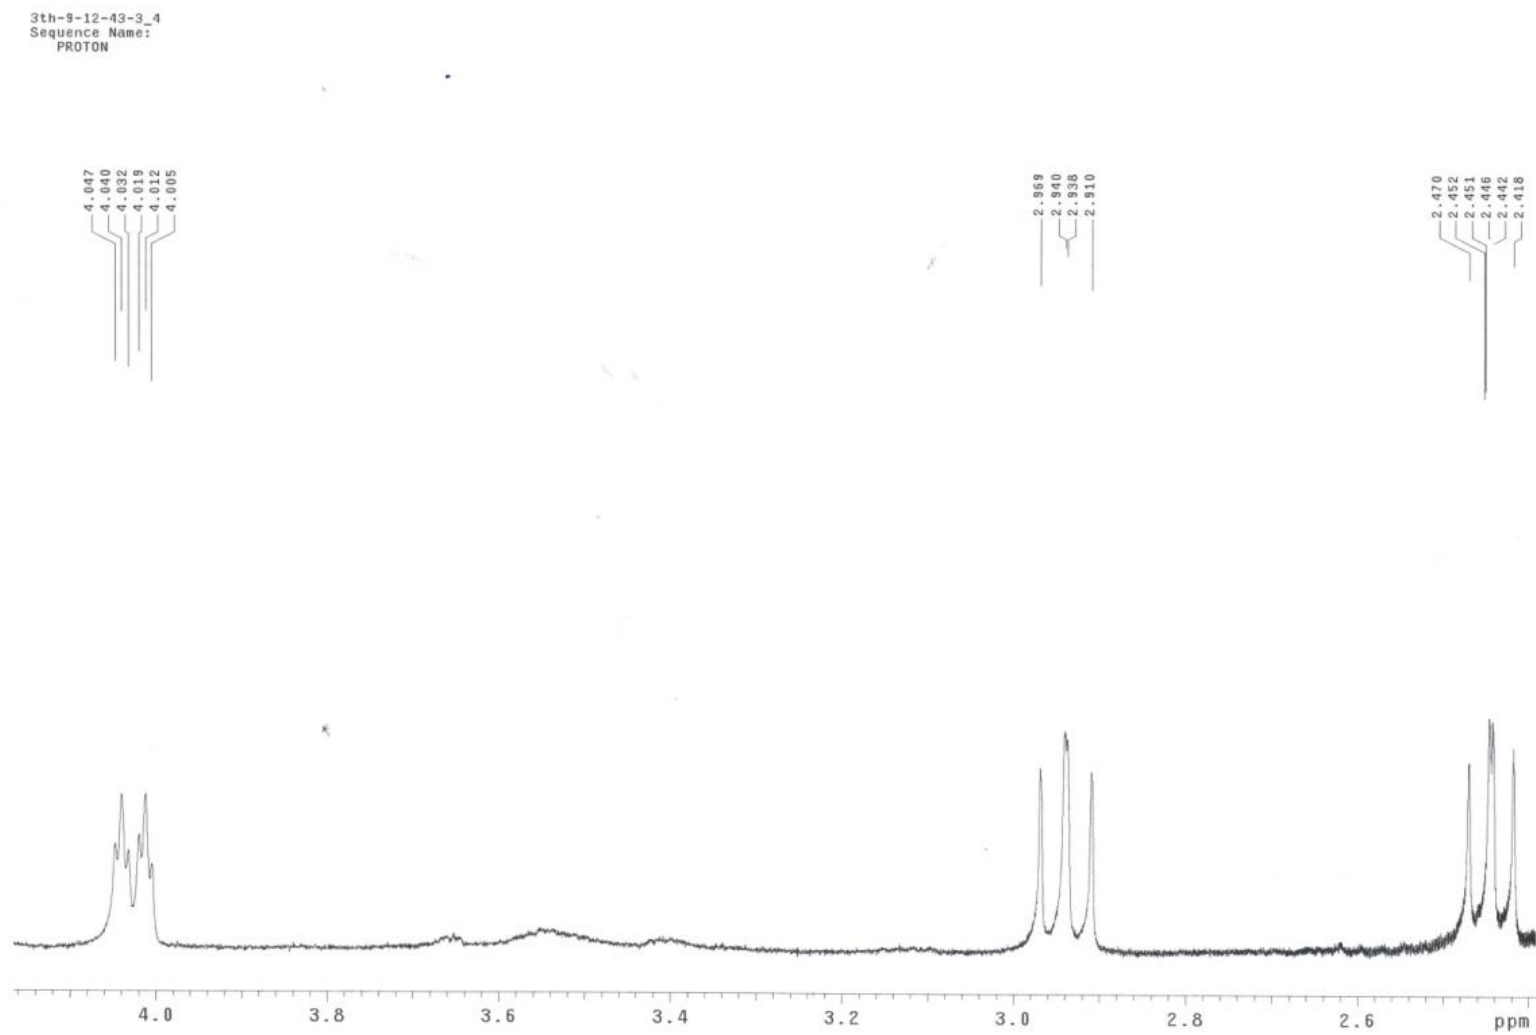

**Figure S3.**  $^{13}\text{C}$  NMR spectrum (100 MHz) of compound **1** in  $\text{CDCl}_3$ .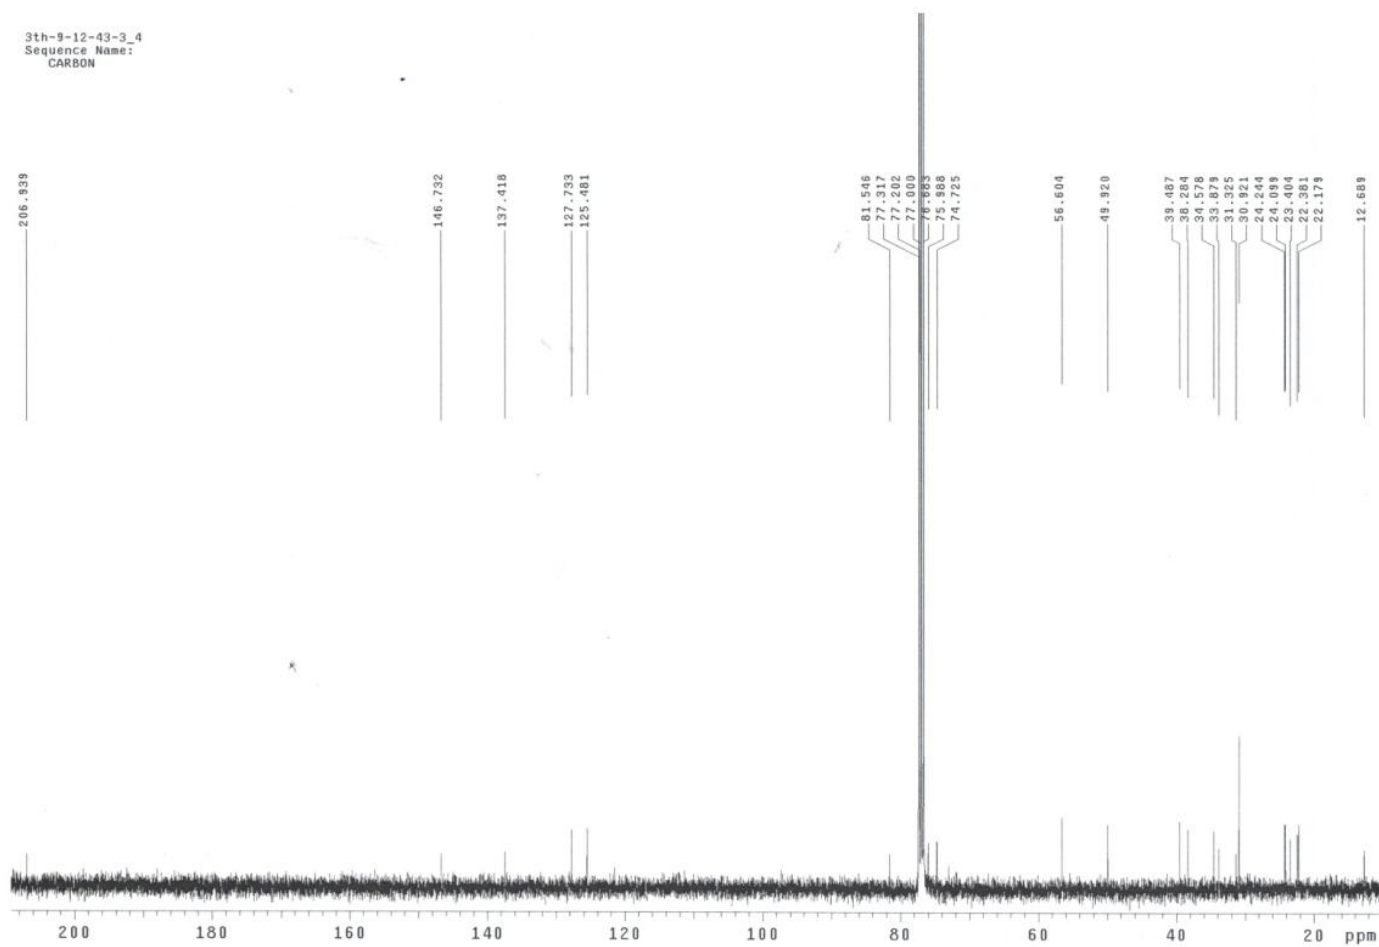

**Figure S4.** DEPT spectrum (100 MHz) of compound **1** in CDCl<sub>3</sub>.

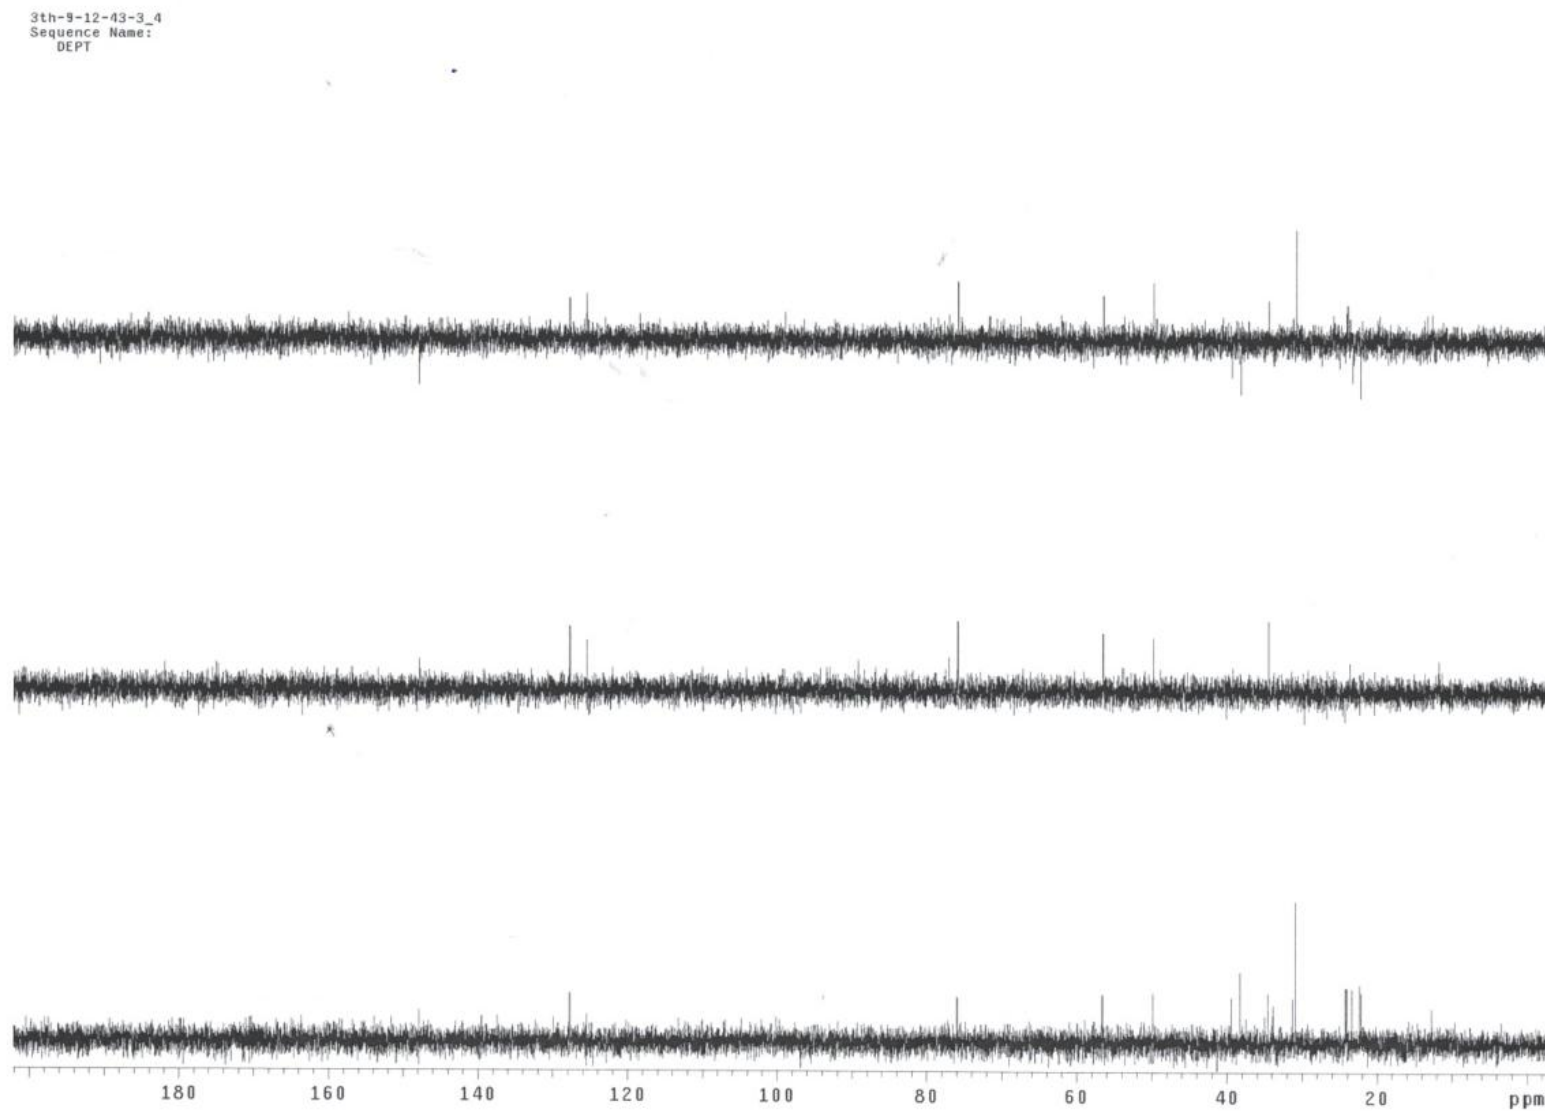

**Figure S5.** HSQC spectrum (400 MHz) of compound **1** in CDCl<sub>3</sub>.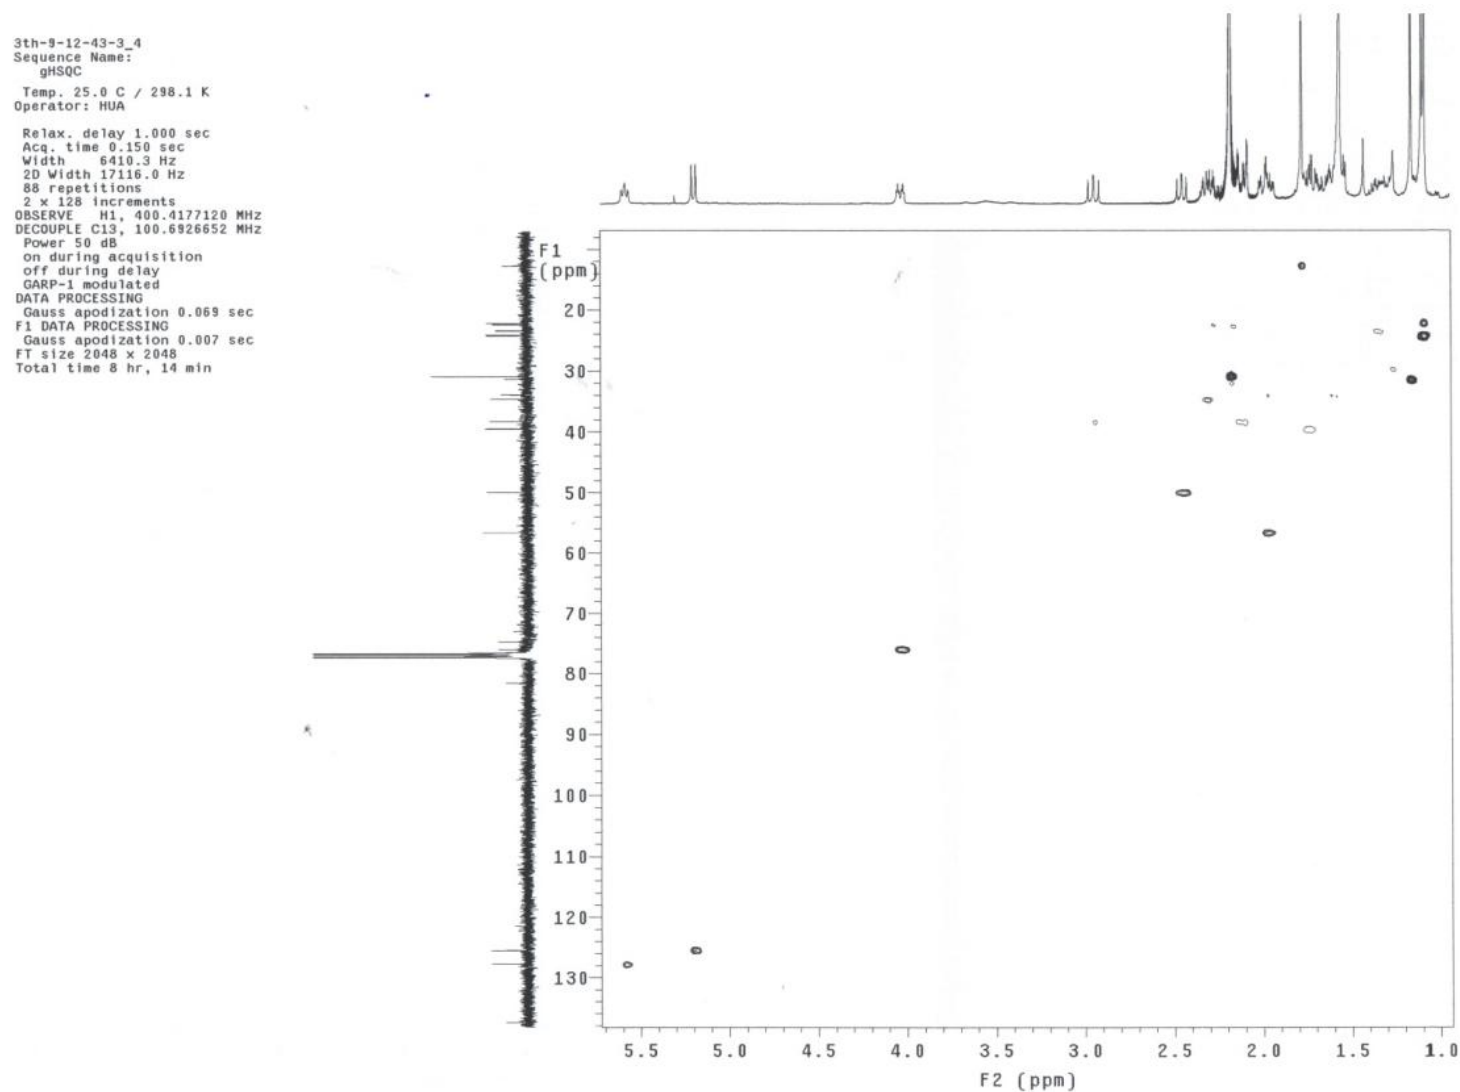

**Figure S6.** HMBC spectrum (400 MHz) of compound **1** in CDCl<sub>3</sub>.

3th-9-12-43-3\_4  
Sequence Name:  
gHMBC  
Temp. 25.0 C / 298.1 K  
Operator: HUA  
Relax. delay 1.000 sec  
Acq. time 0.150 sec  
Width 6410.3 Hz  
2D Width 24161.9 Hz  
88 repetitions  
2 x 200 increments  
OBSERVE H1, 400.4177120 MHz  
DATA PROCESSING  
Sq. sine bell 0.075 sec  
F1 DATA PROCESSING  
Gauss apodization 0.008 sec  
FT size 2048 x 2048  
Total time 13 hr, 19 min

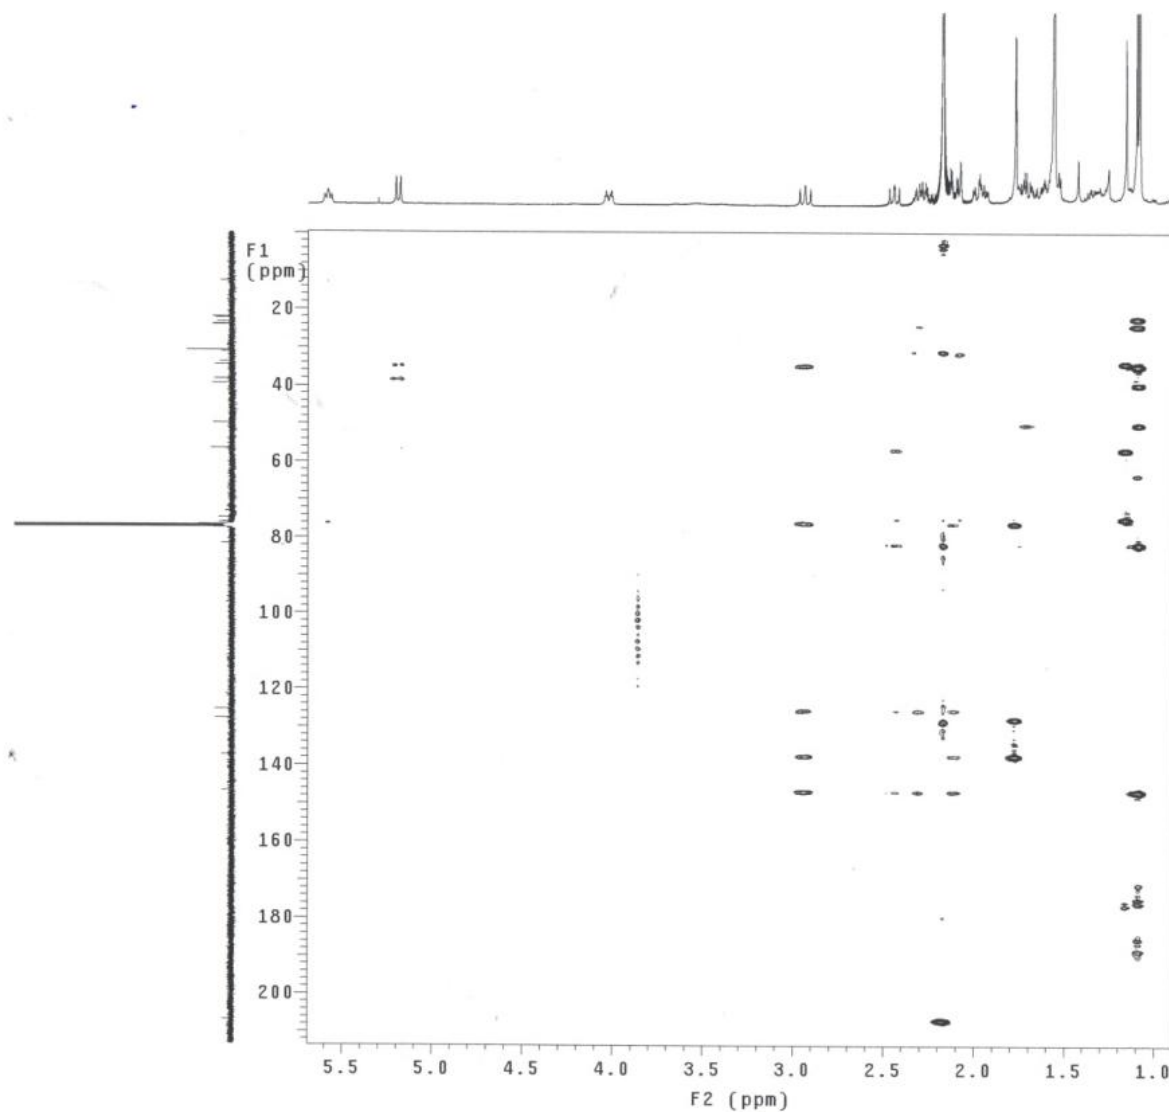

**Figure S7.** COSY spectrum (400 MHz) of compound **1** in CDCl<sub>3</sub>.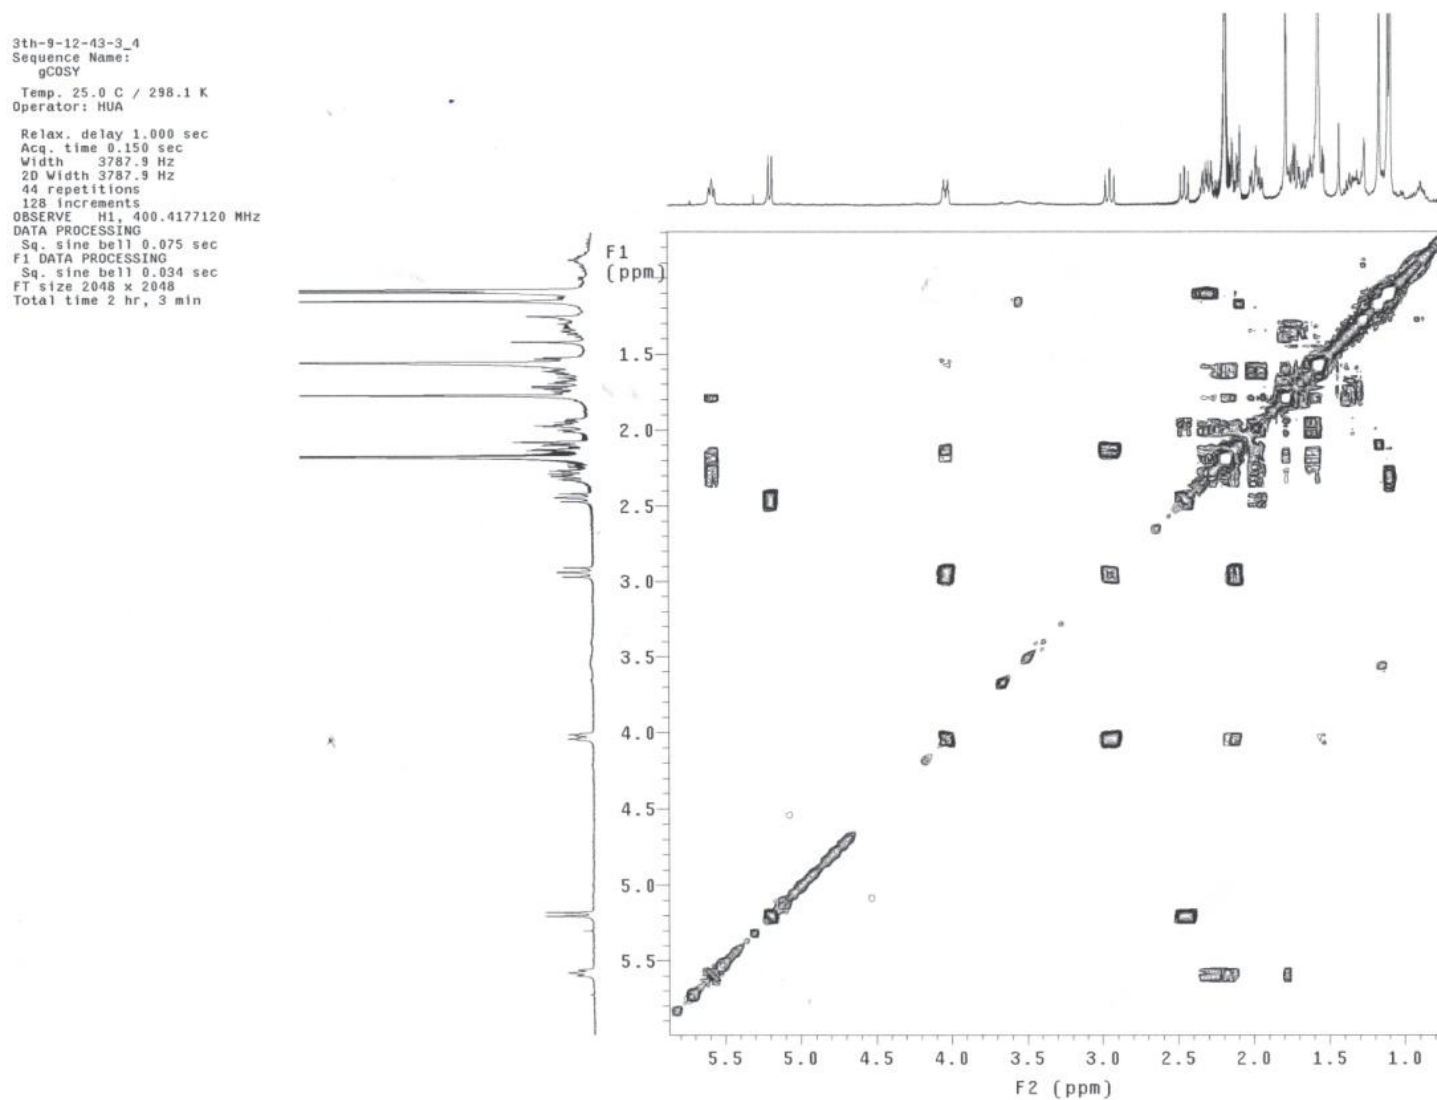

**Figure S8.** NOESY spectrum (400 MHz) of compound **1** in CDCl<sub>3</sub>.

3th-9-12-43-3\_4  
Sequence Name:  
NOESY  
Temp. 25.0 C / 298.1 K  
Operator: HUA  
Relax. delay 1.000 sec  
Acq. time 0.150 sec  
Width 3787.9 Hz  
2D Width 3787.9 Hz  
44 repetitions  
2 x 200 increments  
OBSERVE H1, 400.4177120 MHz  
DATA PROCESSING  
Gauss apodization 0.069 sec  
F1 DATA PROCESSING  
Gauss apodization 0.049 sec  
FT size 2048 x 2048  
Total time 10 hr, 15 min

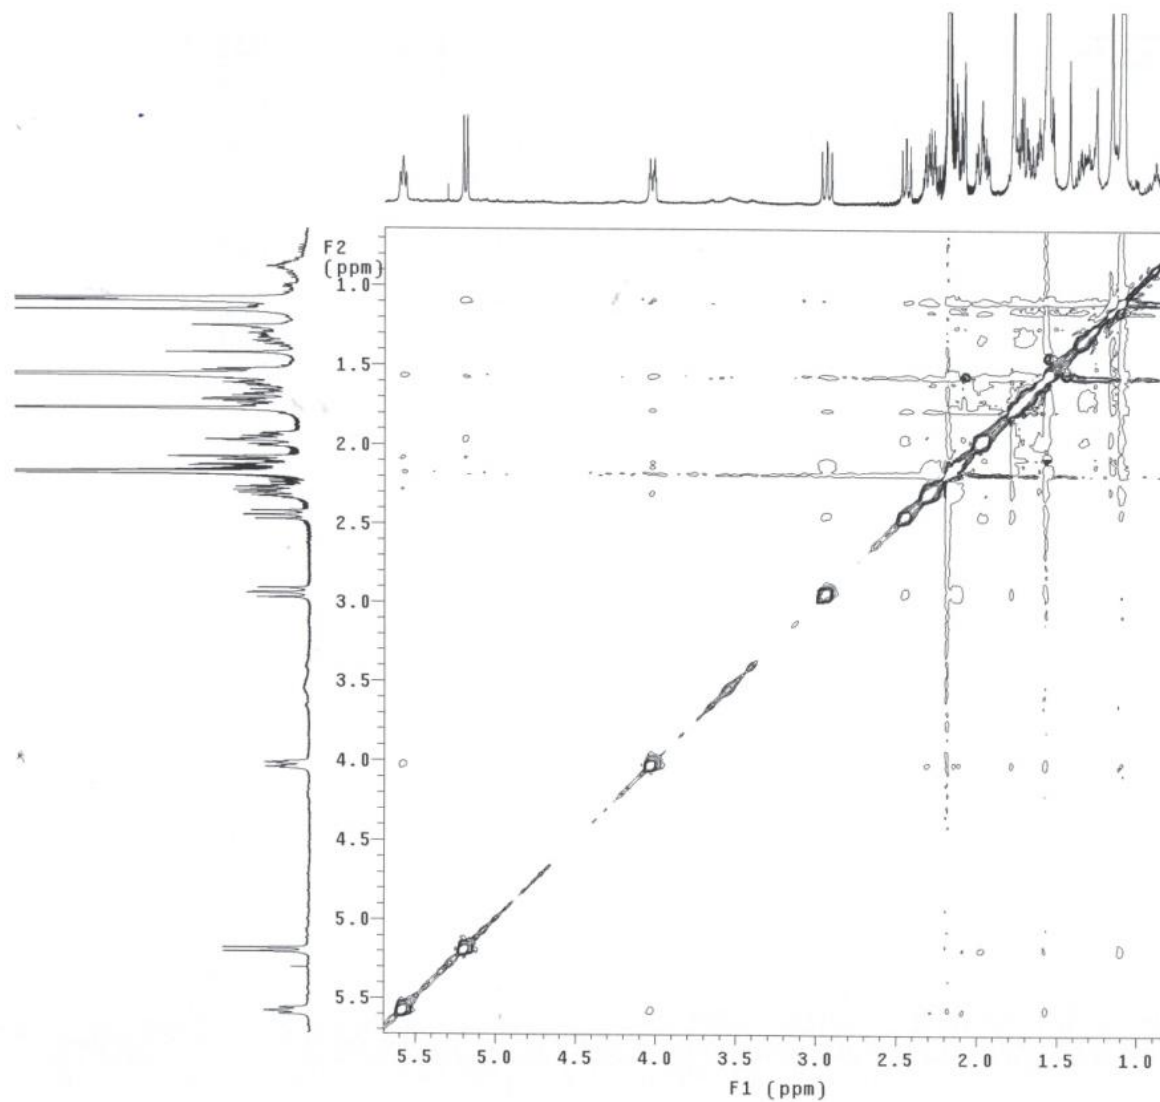



**Figure S9.**  $^1\text{H}$  NMR spectrum (400 MHz) of compound **2** in  $\text{CDCl}_3$ .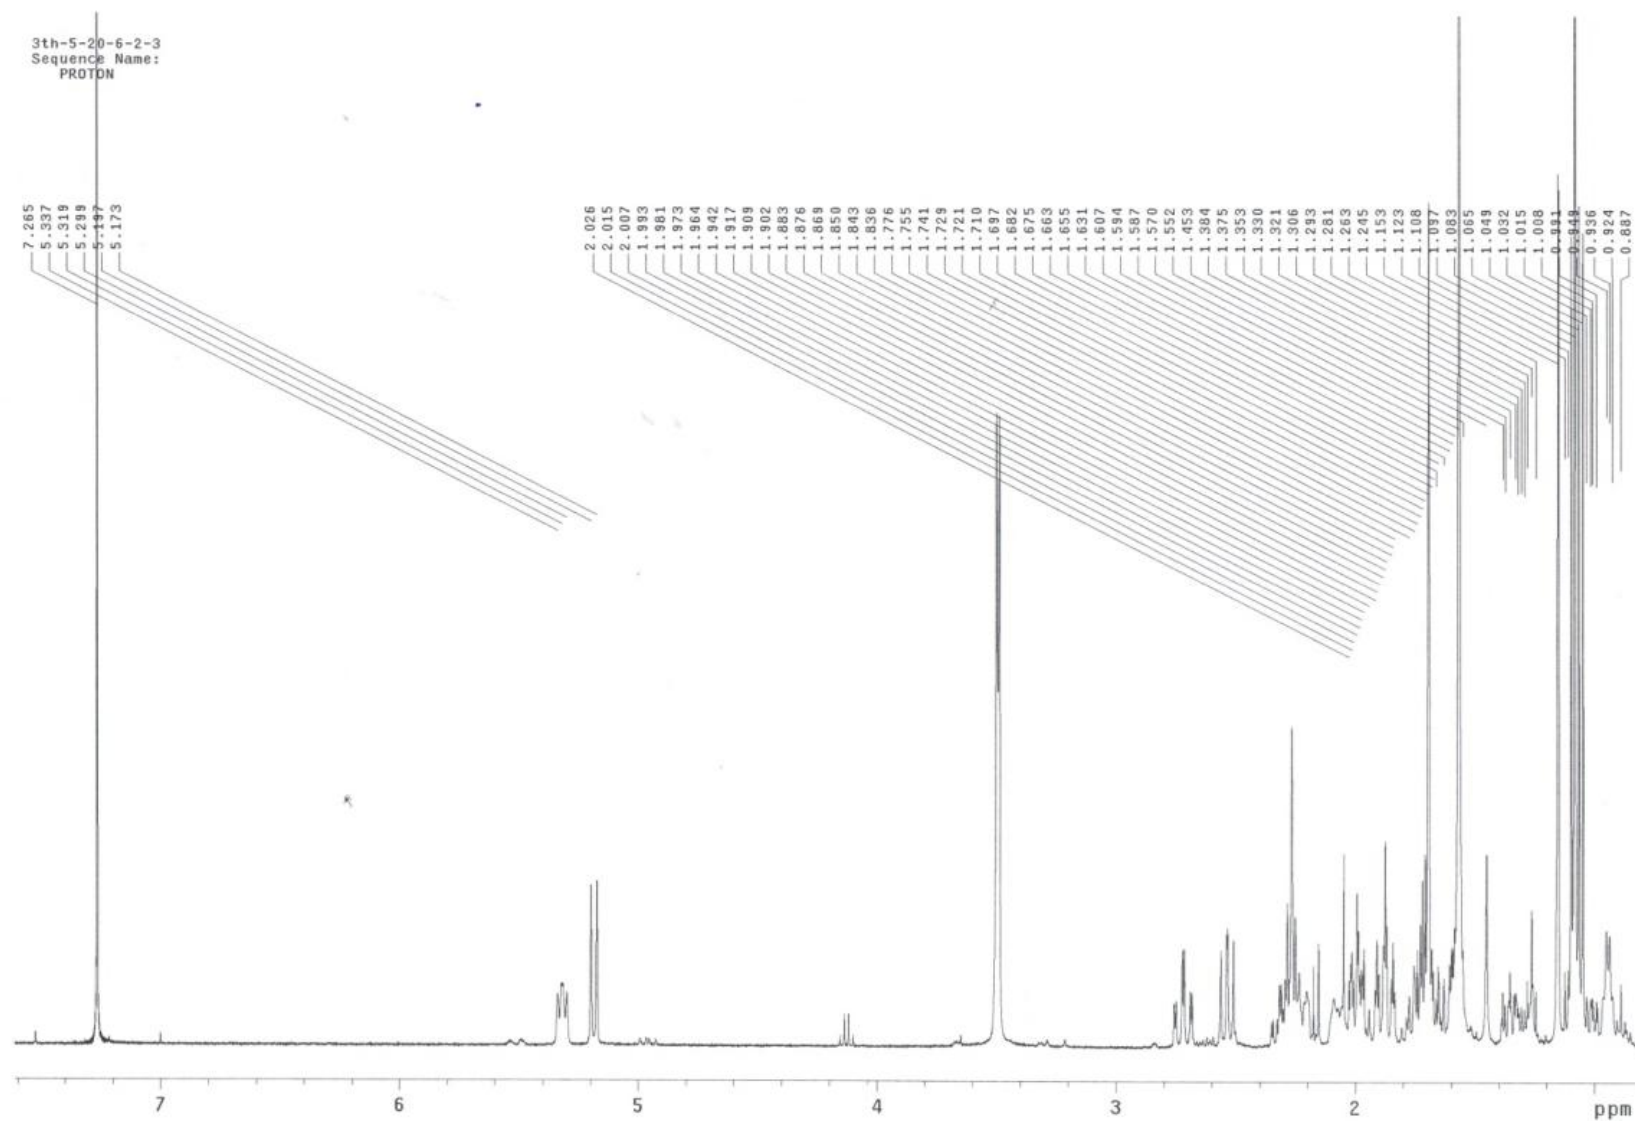

**Figure S10.**  $^1\text{H}$  NMR spectrum (400 MHz) of compound **2** in  $\text{CDCl}_3$ .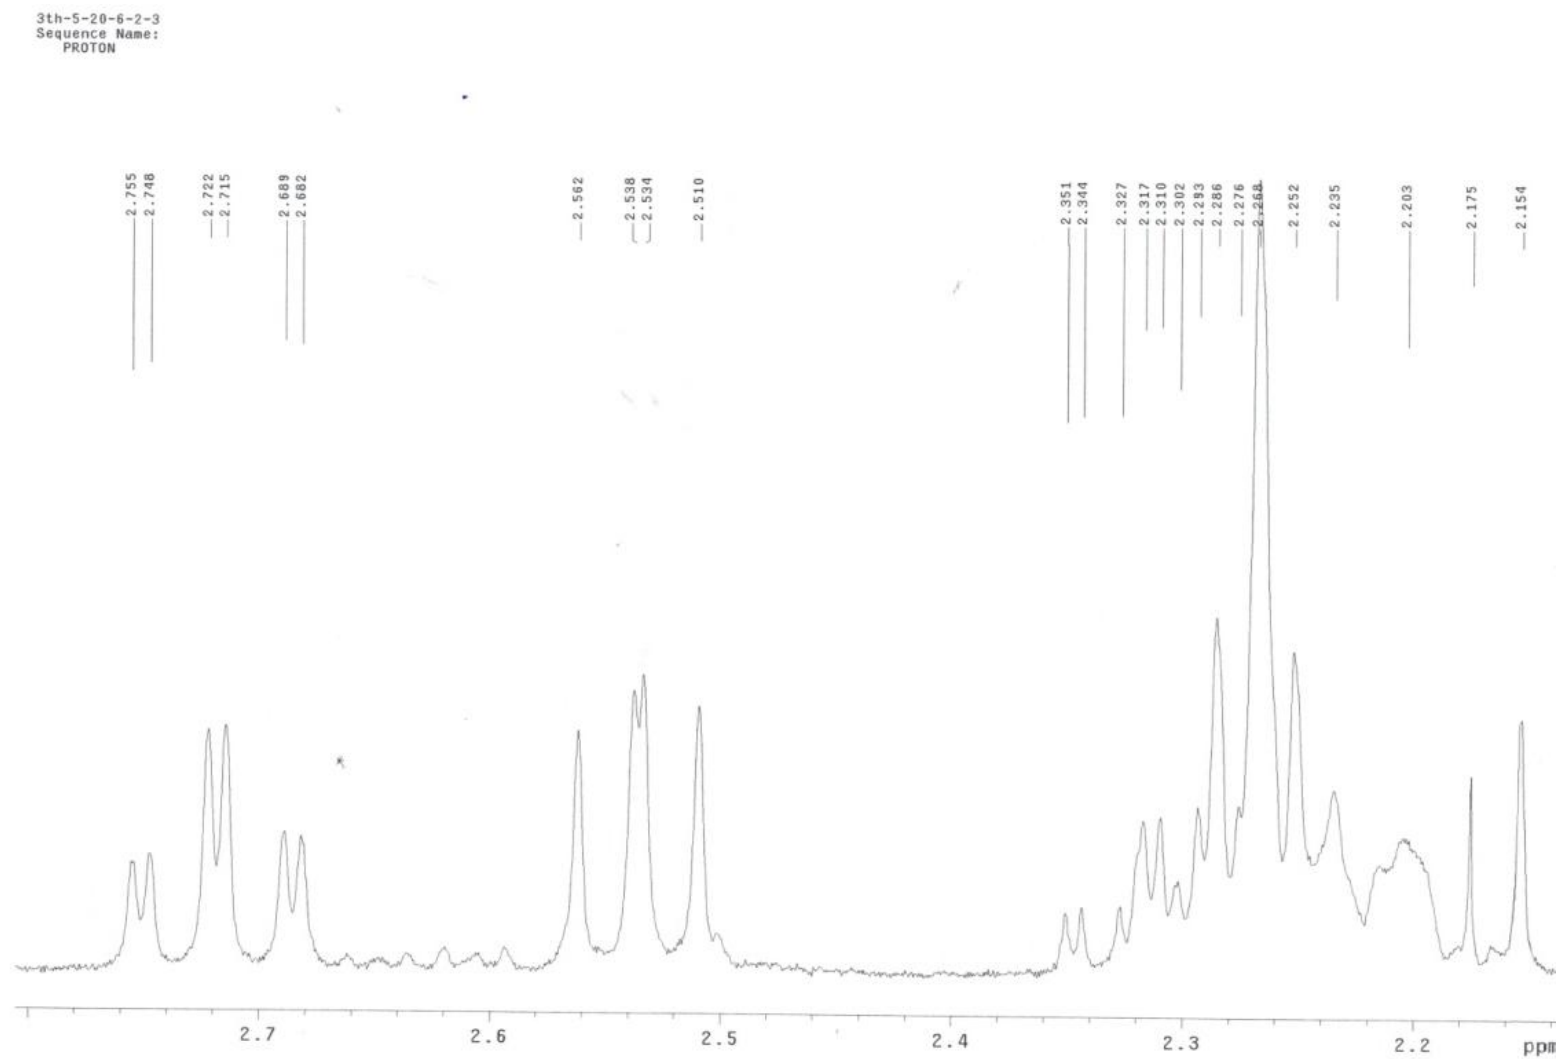

**Figure S11.**  $^{13}\text{C}$  NMR spectrum (100 MHz) of compound **2** in  $\text{CDCl}_3$ .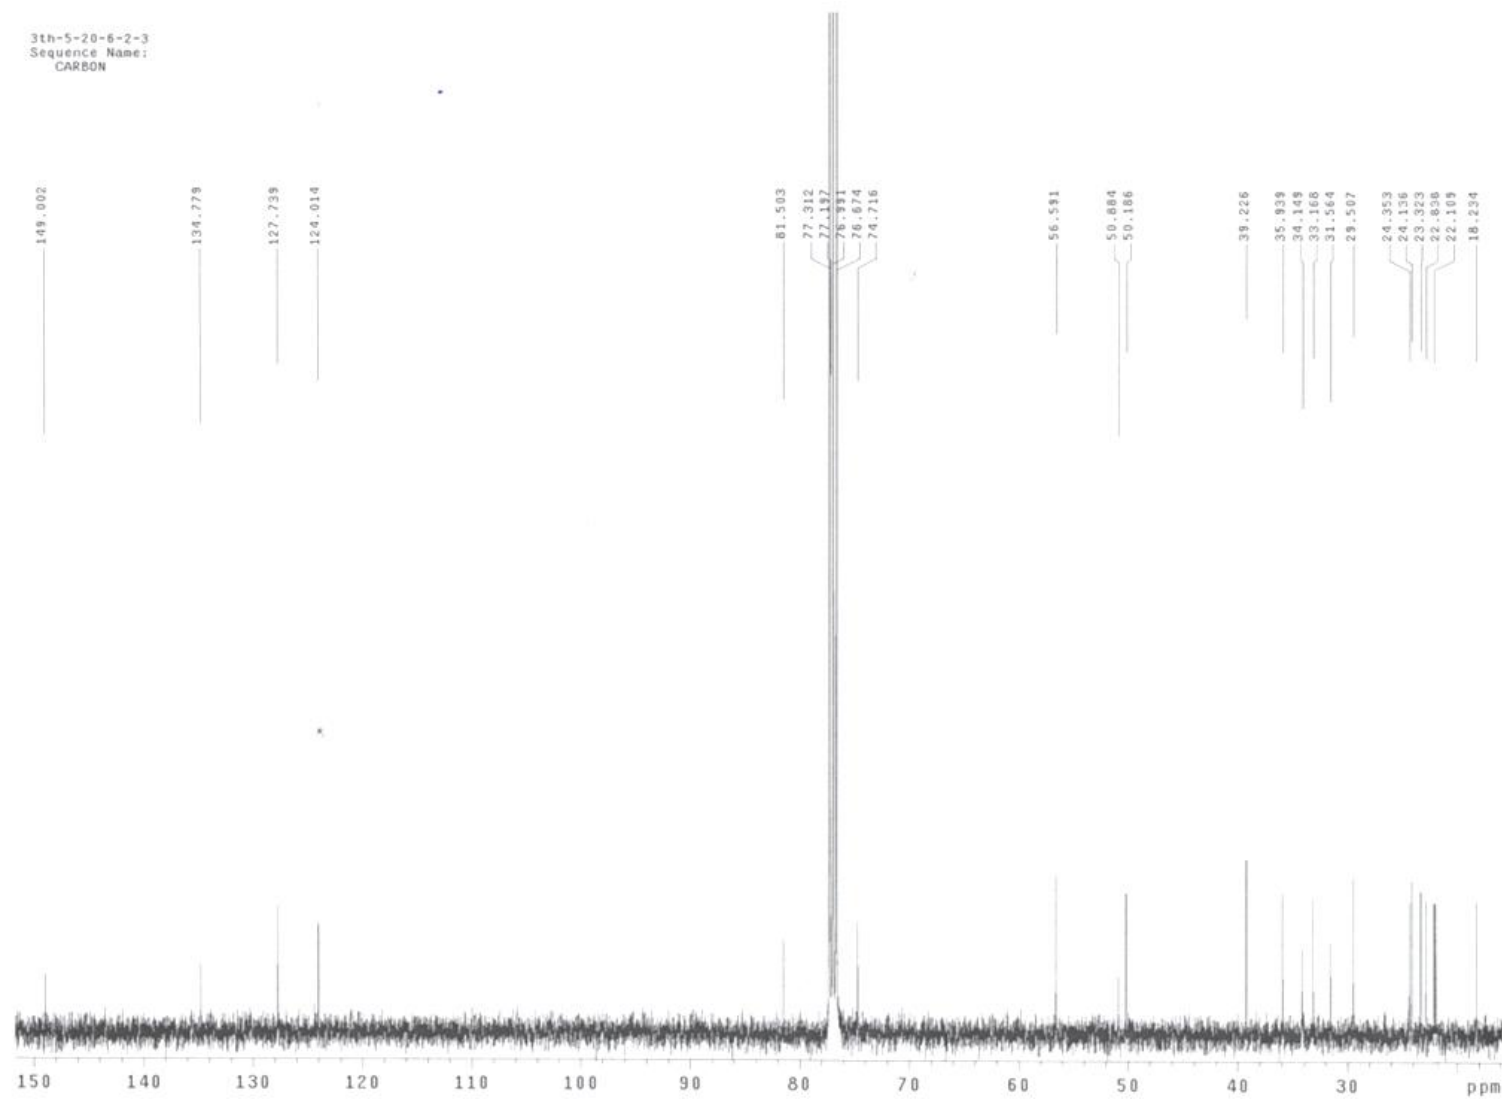

**Figure S12.** DEPT spectrum (100 MHz) of compound **2** in CDCl<sub>3</sub>.

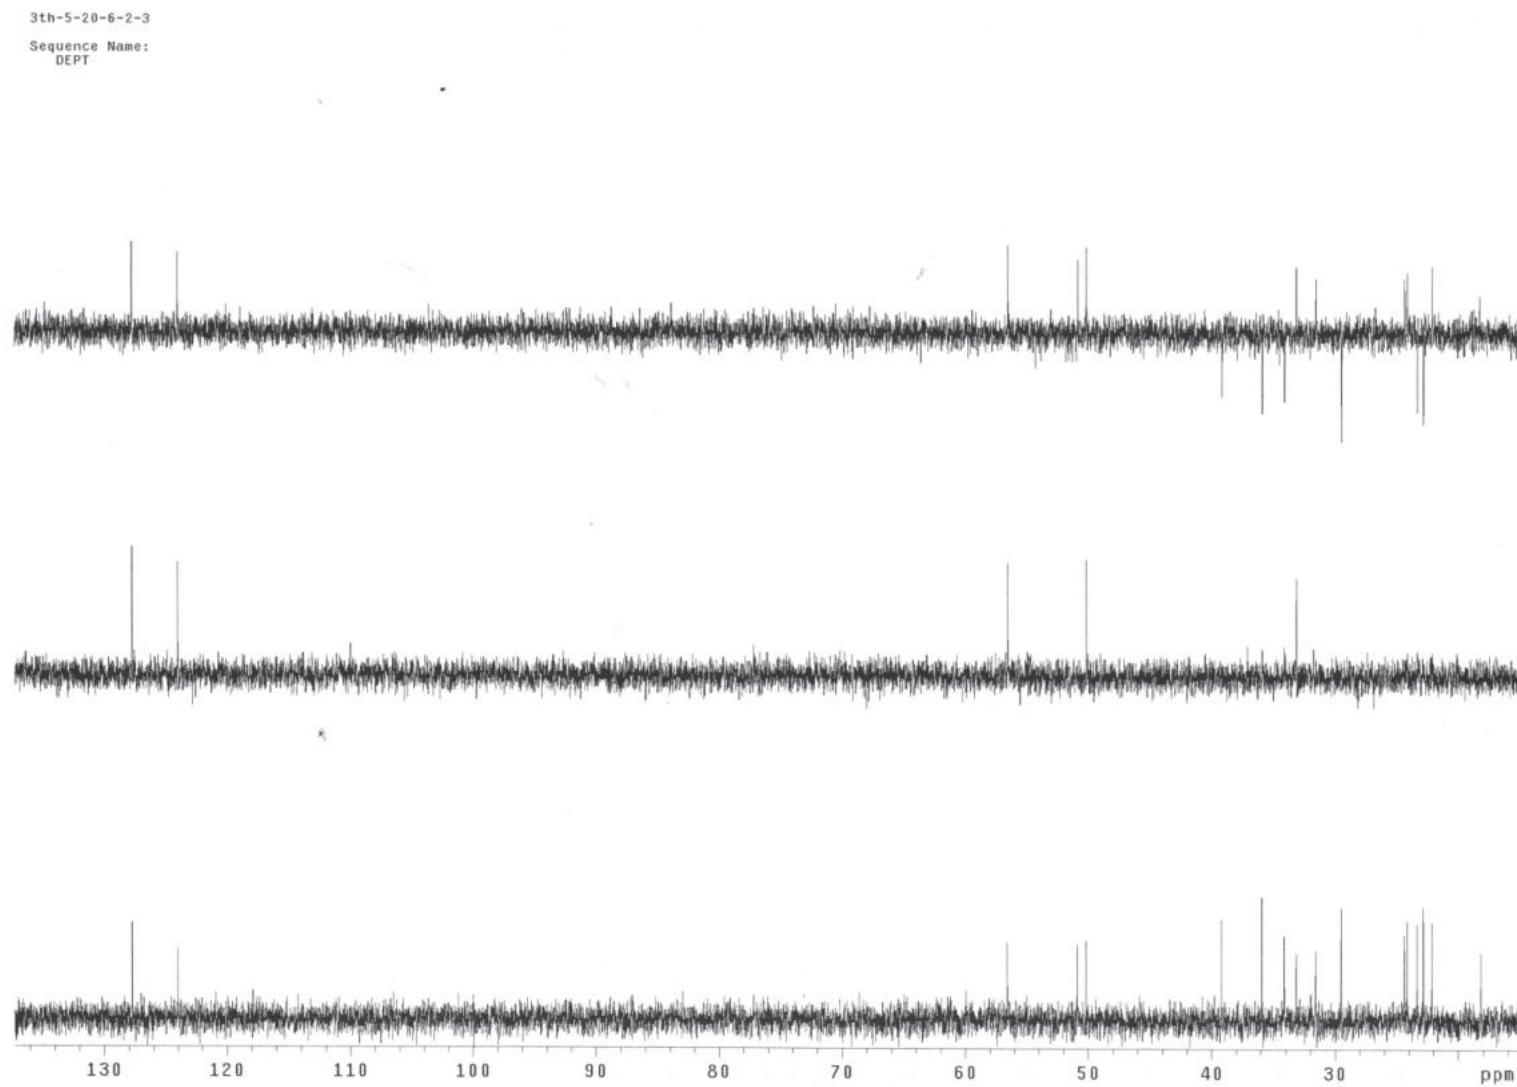

**Figure S13.** HSQC spectrum (400 MHz) of compound **2** in CDCl<sub>3</sub>.

3th-5-20-6-2-3  
Sequence Name:  
gHSQC  
Temp. 25.0 C / 298.1 K  
Operator: HUA  
  
Relax. delay 1.000 sec  
Acq. time 0.150 sec  
Width 6410.3 Hz  
2D Width 17116.0 Hz  
54 repetitions  
2 x 128 increments  
OBSERVE H1, 400.4177120 MHz  
DECOUPLE C13, 100.6926652 MHz  
Power 50 dB  
on during acquisition  
off during delay  
GARP-1 modulated  
DATA PROCESSING  
Gauss apodization 0.069 sec  
F1 DATA PROCESSING  
Gauss apodization 0.007 sec  
FT size 2048 x 2048  
Total time 5 hr, 4 min

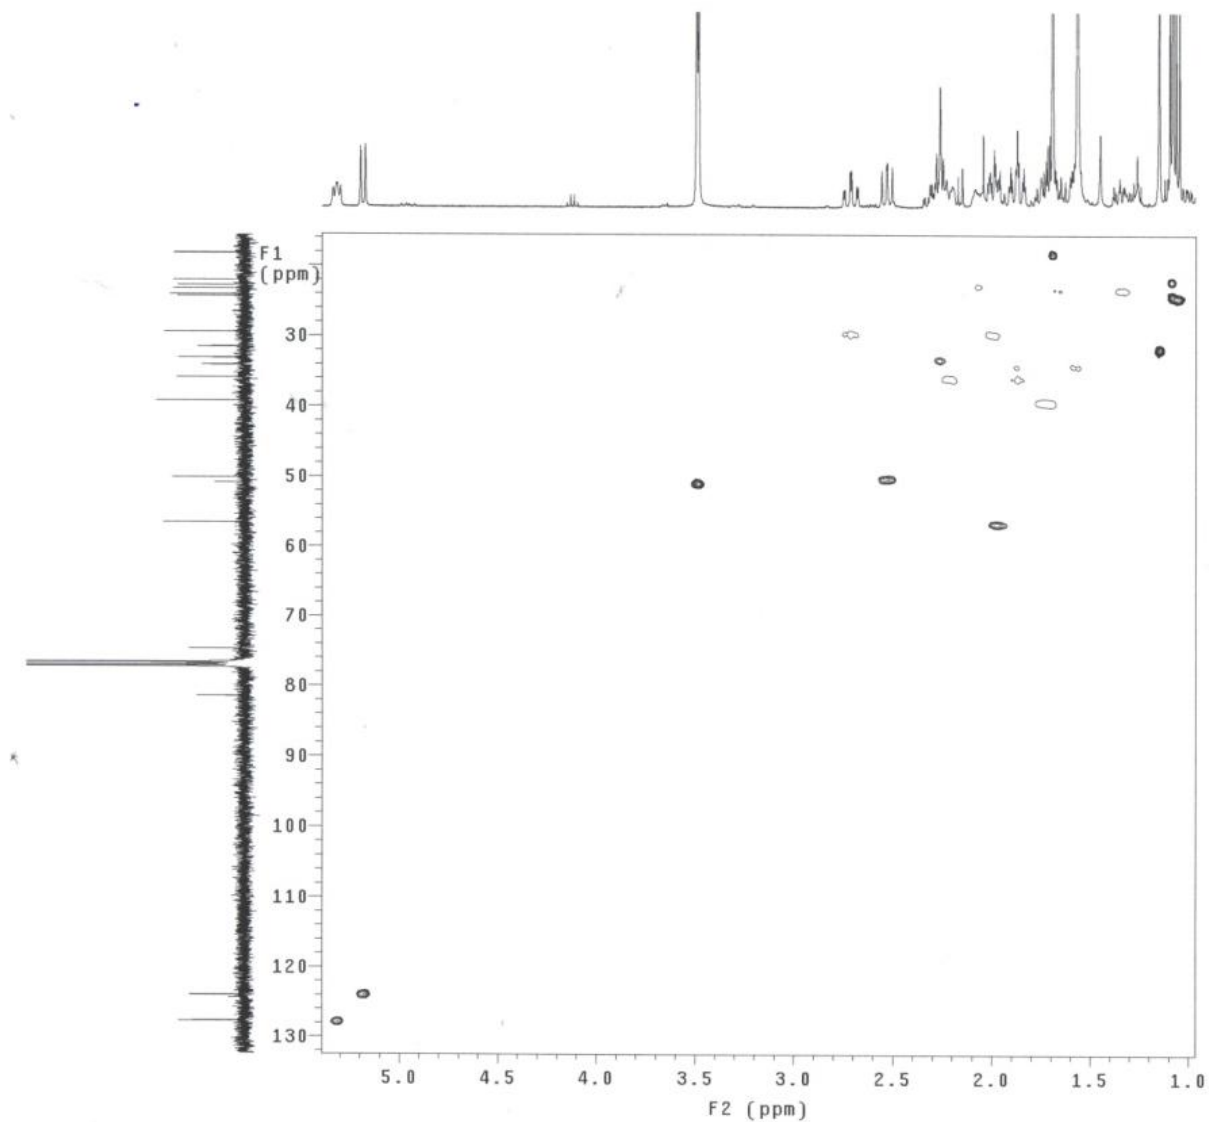

**Figure S14.** HMBC spectrum (400 MHz) of compound **2** in CDCl<sub>3</sub>.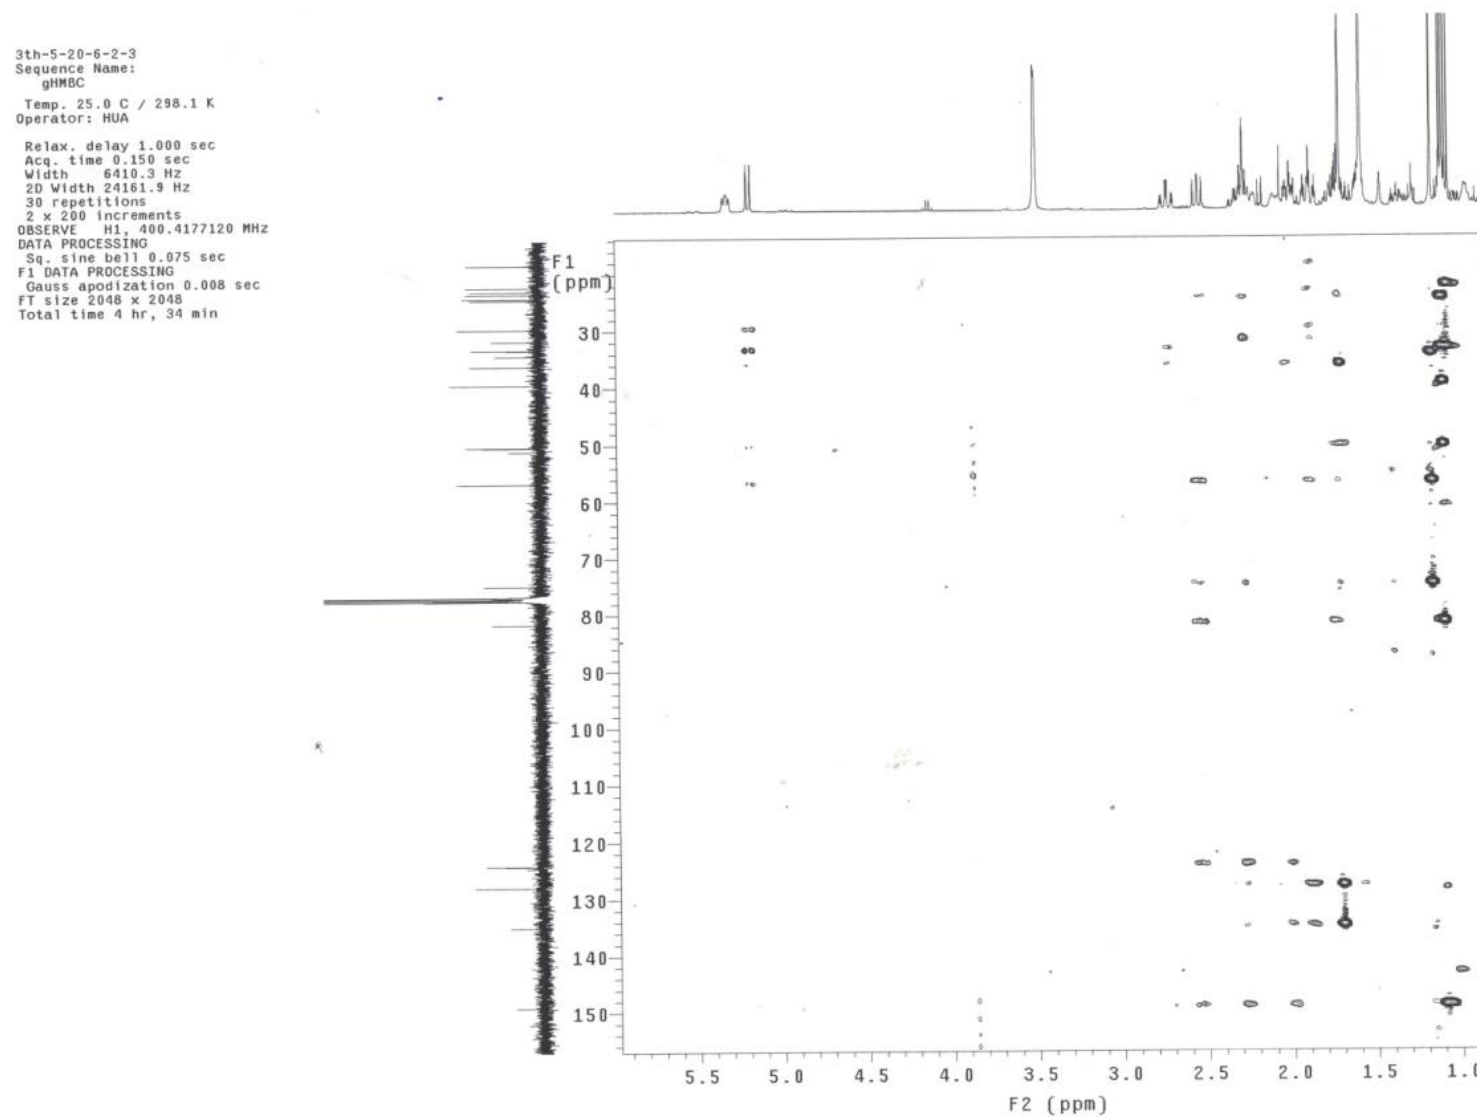

**Figure S15.** COSY spectrum (400 MHz) of compound **2** in CDCl<sub>3</sub>.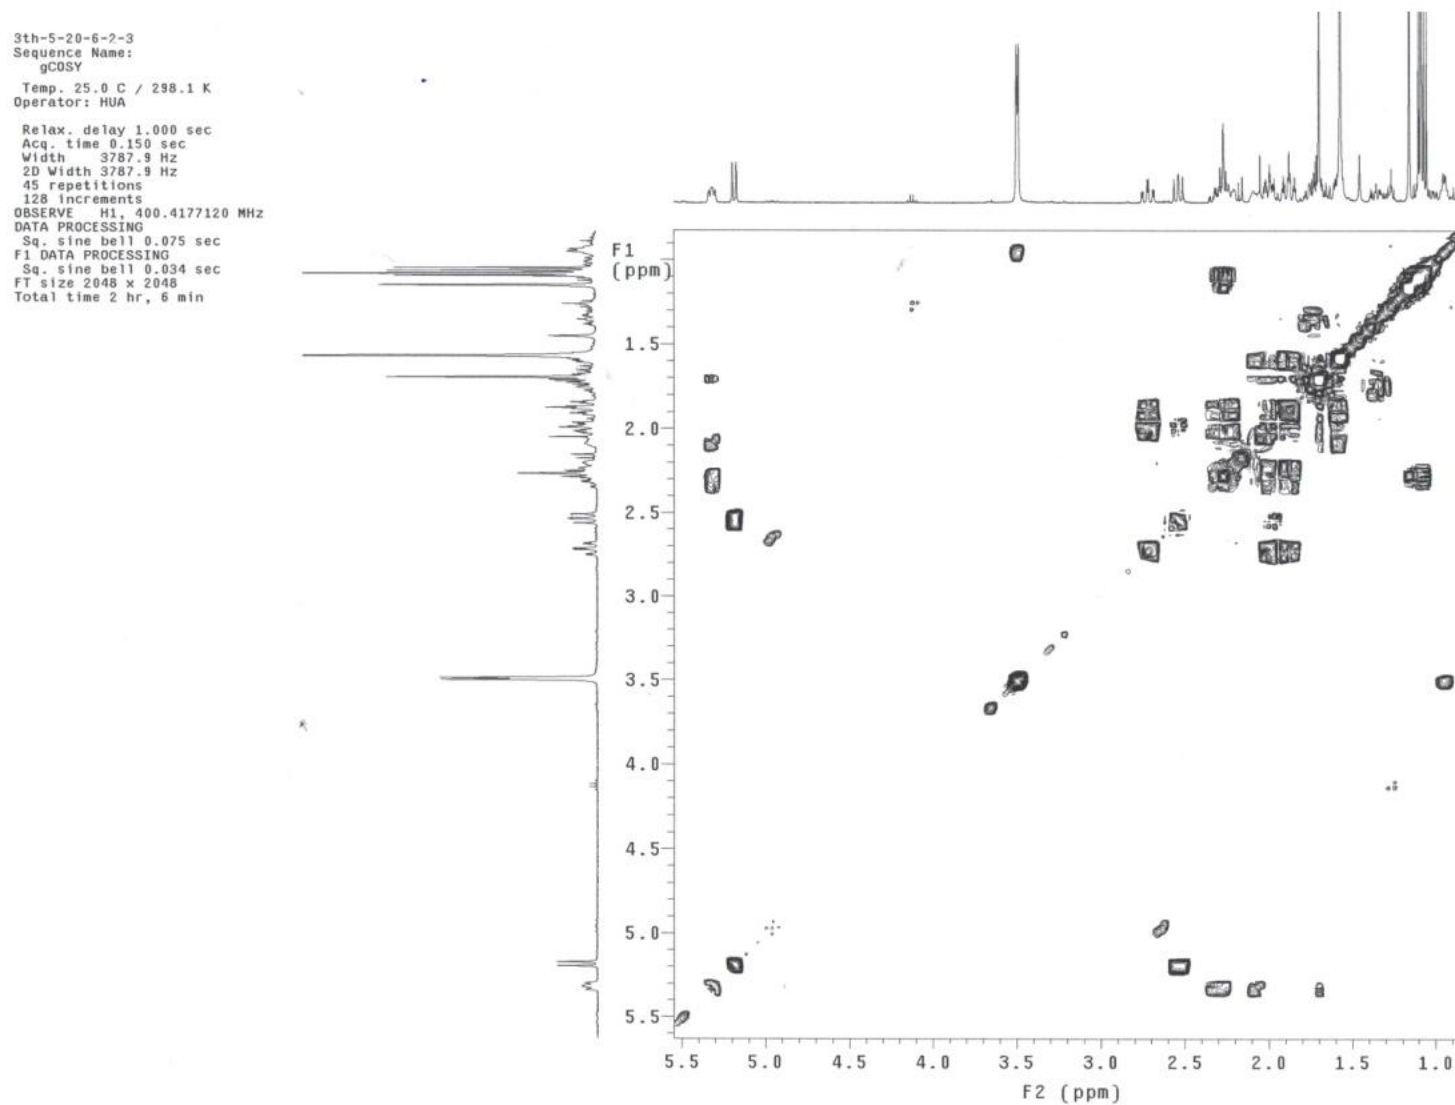

**Figure S16.** NOESY spectrum (400 MHz) of compound **2** in CDCl<sub>3</sub>.

3th-5-20-6-2-3  
Sequence Name:  
NOESY  
Temp. 25.0 C / 298.1 K  
Operator: HUA  
  
Relax. delay 1.000 sec  
Acq. time 0.150 sec  
Width 3787.9 Hz  
2D Width 3787.9 Hz  
30 repetitions  
2 x 200 increments  
OBSERVE H1, 400.4177120 MHz  
DATA PROCESSING  
Gauss apodization 0.069 sec  
F1 DATA PROCESSING  
Gauss apodization 0.049 sec  
FT size 2048 x 2048  
Total time 7 hr, 1 min

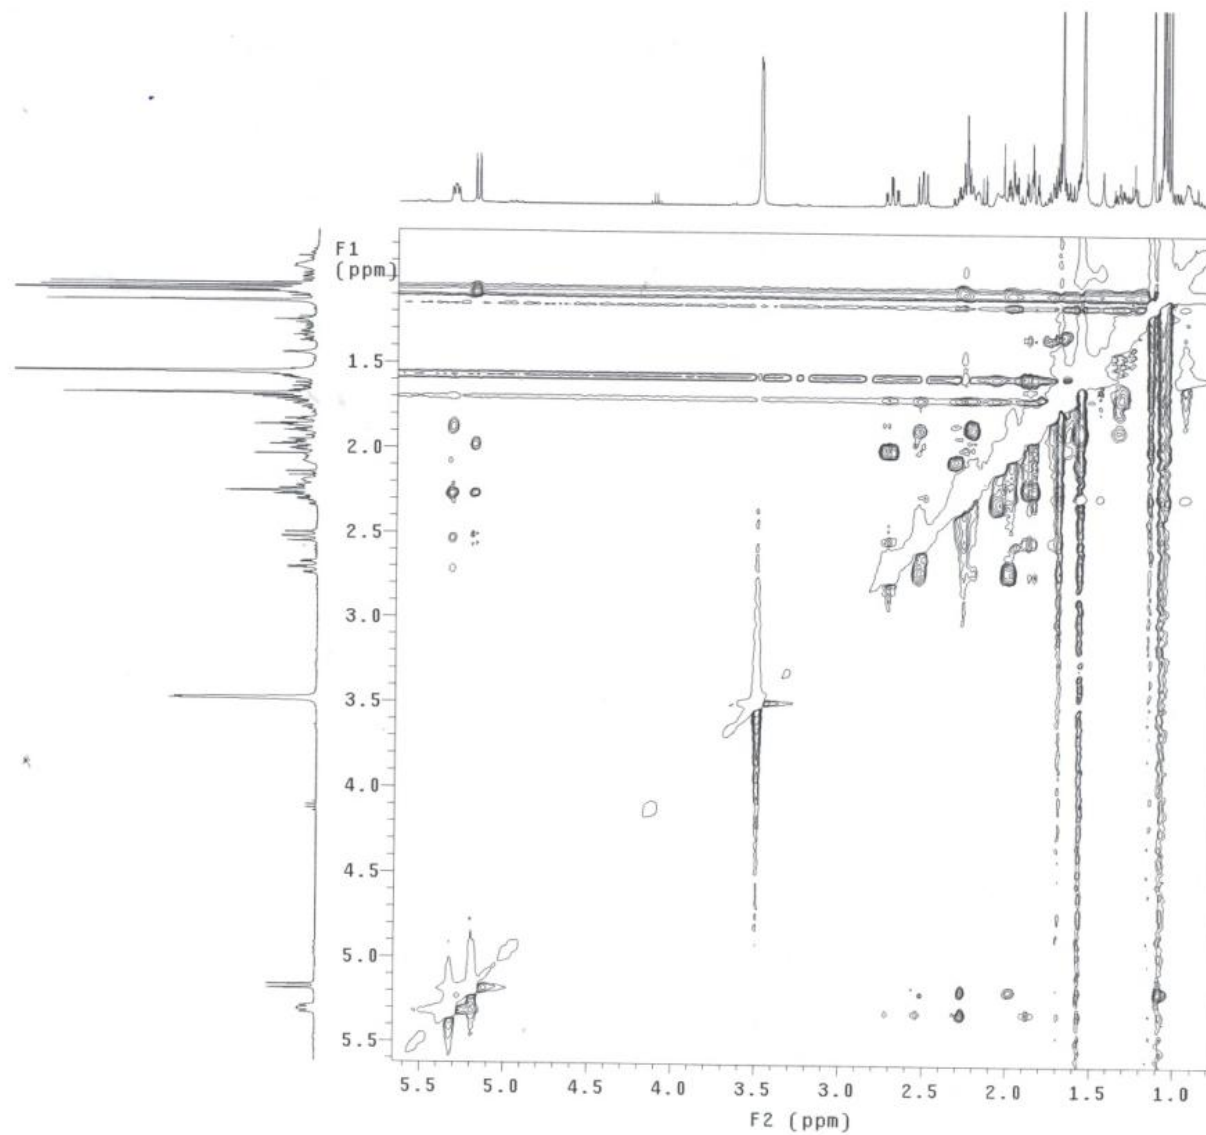

Supplement: s1 [file s1]
